# Supplementary material for: Comparative genomics of defense systems in archaea and bacteria
Source: PubMed Central journal article supplement — Nucleic Acids Res. 2013 Mar 6;41(8):4360–77. doi: 10.1093/nar/gkt157 (PMC3632139; doi:10.1093/nar/gkt157), 2013-03-06
Supplement: supp_gkt157_nar-03407-survey-d-2012-File008.pdf [file supp_gkt157_nar-03407-survey-d-2012-File008.pdf]

## Comparative genomics of defense systems in archaea and bacteria

Kira S. Makarova, Yuri I. Wolf, Eugene V. Koonin\*

### Supplementary tables

**Table S1. Poorly characterized genes in the genomic neighborhoods of the Dnd defense system<sup>a</sup>**

| Gene and Family                         | Comment and References                                                                                                                                                                                                                                                                                      |
|-----------------------------------------|-------------------------------------------------------------------------------------------------------------------------------------------------------------------------------------------------------------------------------------------------------------------------------------------------------------|
| <b>Gene in the modification cluster</b> |                                                                                                                                                                                                                                                                                                             |
| DndB<br>pfam14072                       | ParB family nuclease, also known as DGQHR domain, associated with many defense systems (1), often contains additional HEPN superfamily domain, predicted endoribonuclease (2)                                                                                                                               |
| DndD                                    | ABC type ATPase of Mre11/Rad50 subfamily                                                                                                                                                                                                                                                                    |
| DndE<br>pfam8870                        | The structure has been solved and DNA-binding demonstrated (3); HHPred identifies significant similarity of N-terminal region with RelE family of RHH fold, an antitoxin associated with many TA systems; this domain is also fused to FtsK and HerA-like ATPases, usually associated with <i>dnd</i> genes |
| <b>Associated gene families</b>         |                                                                                                                                                                                                                                                                                                             |
| DndF                                    | The N-terminal domain belongs to the HEPN endoribonuclease superfamily (2), C-terminal domain is a predicted NTPase likely specifically GTPase                                                                                                                                                              |
| DndG<br>pfam08747                       | C-terminal HTH domain                                                                                                                                                                                                                                                                                       |
| DndH                                    | The C-terminal domain is a HerA-like helicase/ATPase, the domain next to it belongs to the PD-(D/E)xK endonuclease superfamily. This protein is the predicted main REase subunit of the system.                                                                                                             |
| PSHAb0092-like                          | Loosely associate gene, belongs to the MutL-related paraMORC family; proteins of this family are encoded in the vicinity of many R-M systems (4)                                                                                                                                                            |

<sup>a</sup>Identification of protein domains and functional prediction for experimentally uncharacterized proteins was based on the results of protein sequence and structure database searches using the PSI-BLAST and HHPred methods (5,6).

**Table S2. Genes in the genomic neighborhoods of the Pgl defense system<sup>a</sup>**

| <b>Family</b>                   | <b>Comment and references</b>                                                                                                                                                                    |
|---------------------------------|--------------------------------------------------------------------------------------------------------------------------------------------------------------------------------------------------|
| <b>Core genes</b>               |                                                                                                                                                                                                  |
| pfam08665                       | PglZ, alkaline phosphatase family enzyme                                                                                                                                                         |
| COG1002                         | Methylase subunit associated with R-M systems; often encoded in a separate locus                                                                                                                 |
| COG4930                         | ATP-dependent Lon-type protease                                                                                                                                                                  |
| <b>Associated gene families</b> |                                                                                                                                                                                                  |
| pfam08747                       | Uncharacterized protein                                                                                                                                                                          |
| COG0553                         | Superfamily II DNA helicase; often fused to a methylase domain                                                                                                                                   |
| pfam08849                       | Similar to an uncharacterized family DUF3387 which is often fused to R-M. Structure is solved - pdb: 3bhw; DALI reveals structural similarity with recognition domains of R-M systems            |
| COG1201                         | Lhr-like helicase                                                                                                                                                                                |
| pfam10923                       | ATPase domain-containing protein                                                                                                                                                                 |
| COG0863                         | DNA modification methylase                                                                                                                                                                       |
| COG1479/<br>COG3472             | RloF-like component of potential R-M system found in predicted operon for type I R-M system (7); contains N-terminal DGQHR (ParB family nuclease) domain and C-terminal HNH-type nuclease domain |
| COG1061                         | Superfamily II DNA helicase                                                                                                                                                                      |
| COG2865                         | Transcriptional regulator containing an HTH domain and diverged ATP-binding domain (Schlafen-like)                                                                                               |
| COG0515                         | Duplicated serine/threonine protein kinase domains; some contain nuclease-related NERD domain                                                                                                    |

<sup>a</sup>Identification of protein domains and functional prediction for experimentally uncharacterized proteins was based on the results of protein sequence and structure database searches using the PSI-BLAST and HHPred methods (5,6).

**Table S3. Poorly characterized and recently predicted TA systems<sup>a</sup>**

| <b>TOXINS<br/>Family and<br/>genes</b>                    | <b>Predicted or<br/>solved (PDB)<br/>structure and<br/>activity</b>                    | <b>ANTITOXIN<br/>Family and<br/>genes</b> | <b>Predicted or<br/>solved (PDB)<br/>structure</b>                                             | <b>Comments and references</b>                                                                                                                     |
|-----------------------------------------------------------|----------------------------------------------------------------------------------------|-------------------------------------------|------------------------------------------------------------------------------------------------|----------------------------------------------------------------------------------------------------------------------------------------------------|
| <b>Target is unknown</b>                                  |                                                                                        |                                           |                                                                                                |                                                                                                                                                    |
| HEPN<br>COG2250/<br>COG2445/<br>COG2361                   | Ribonuclease<br>(1jog)                                                                 | MNT,<br>COG1708/<br>COG1669               | Nucleotidyl-<br>transferase<br>(1no5)                                                          | HEPN of the COG2250 family is one<br>of the most prominent genomic<br>determinants of the thermophilic life<br>style                               |
| COG2856                                                   | Zn-dependent<br>protease (3dtk)                                                        | Xre                                       | HTH fold                                                                                       | Often fused to antitoxin domain.<br>Frequently associated with RelE and<br>PIN toxins                                                              |
| COG3832                                                   | Cyclase/dehydratase<br>family protein,<br>START domain<br>superfamily (1xuv)           | ArsR-like                                 | HTH fold                                                                                       |                                                                                                                                                    |
| GNAT                                                      | GNAT<br>acetyltransferase                                                              | Xre and RHH                               | HTH fold and<br>RHH fold                                                                       | (8)                                                                                                                                                |
| COG2929/<br>DUF497                                        | No prediction or<br>structure                                                          | COG5304 and<br>COG3514                    | RHH fold                                                                                       | Toxin sequences are compatible with<br>RelE secondary structure                                                                                    |
| RES<br>COG5654                                            | RES domain<br>superfamily                                                              | Xre<br>COG5642                            | HTH fold                                                                                       | (8)                                                                                                                                                |
| DUF397                                                    | No prediction or<br>structure                                                          | Xre                                       | HTH fold                                                                                       | Potential pleiotropic regulator that<br>affects morphogenesis, antibiotic<br>production, and catabolite control in<br>Streptomyces (9)             |
| AbiG, AbiE<br>DUF1814/<br>COG2253/<br>COG4849/<br>COG4914 | Nucleotidyltransferase                                                                 | COG5340/<br>COG4861                       | Contains HTH<br>domain                                                                         | See also ABI systems                                                                                                                               |
| MAE_32580<br>COG4634/<br>DUF82                            | Compatible with<br>PIN structure and<br>motifs                                         | COG2442                                   | winged HTH –<br>HTH fold                                                                       | (1)                                                                                                                                                |
| GinC<br>COG4476<br>DUF1071                                | Unique BH2638-<br>like fold (2oy9)                                                     | COG1393,<br>ArsC, Arsenate<br>reductase   | Thioredoxin –<br>fold                                                                          | Thioredoxin-like proteins involved in<br>transcriptional regulation, (10) shown<br>to be antitoxins (11)                                           |
| DUF4160,<br>MAE_01690                                     | Metal-dependent<br>enzyme, possibly a<br>nuclease                                      | DUF3532/<br>DUF2442                       | NE0471 N-<br>terminal<br>domain-like<br>fold (2auw) and<br>(in some) xre<br>family HTH<br>fold | (1)                                                                                                                                                |
| <b>Mechanism of antitoxin is unknown</b>                  |                                                                                        |                                           |                                                                                                |                                                                                                                                                    |
| RnlA/IsoA                                                 | RNase LS<br>(N-terminal TBP-<br>like substrate-<br>binding, C-terminal<br>HEPN domain) | RnlB/IsoB                                 | No prediction                                                                                  | TA system that cleaves bacteriophage<br>T4 mRNAs (12) and contributes to<br>mRNA turnover in <i>E. coli</i> (13), often<br>associated with RNase H |

|                                                        |                                                                 |                                             |                                                                             |                                                                                                                                                                                                                                            |
|--------------------------------------------------------|-----------------------------------------------------------------|---------------------------------------------|-----------------------------------------------------------------------------|--------------------------------------------------------------------------------------------------------------------------------------------------------------------------------------------------------------------------------------------|
|                                                        | ribonuclease)                                                   |                                             |                                                                             |                                                                                                                                                                                                                                            |
| HicA<br>COG1724                                        | Translation-independent mRNA interferase; RBD-like fold (1whz)  | HicB                                        | RNAse H-like domain. Often fused to a DNA-binding domain, either RHH or HTH | HicA has a bacteriostatic rather than a bactericidal effect (14)                                                                                                                                                                           |
| <b>Unknown structure and/or mechanism of the toxin</b> |                                                                 |                                             |                                                                             |                                                                                                                                                                                                                                            |
| YafO                                                   | No prediction or structure, ribosome dependent mRNA interferase | YafN                                        | PHD/YefM                                                                    | (15); (16)                                                                                                                                                                                                                                 |
| YeeV<br>DUF1219<br>CbtA/Ykfl/Y<br>pjF toxin family     | Inhibits cell division by targeting FtsZ and MreB               | YeeU                                        | Antitoxin homologous to toxins YoeB and RelE (2inw)                         | (17) Structure of YeeU has been solved (18), Proposed TA system type IV: antitoxin protects target but does not bind the toxin (19)                                                                                                        |
| COG4396<br>GinA<br>Gam                                 | Antiparallel coiled-coil fold (2p2u)                            | COG4712/<br>DUF1071<br>Sak-like             | Rad52/22 family; dsRNA-binding domain-like fold                             | Toxic effect demonstrated (11). GinA is a close homolog of phage Mu host-nuclease inhibitor protein Gam which inhibits RecBCD binding to dsDNA ends (20); Sak is single-strand annealing protein (21); present predominantly in Firmicutes |
| DUF3169,<br>GinD                                       | Membrane protein                                                | COG1476                                     | Xre family – HTH fold                                                       | Experimentally validated using genetic approach (11) Also often encoded in one operon with membrane associated metal-dependent protease of DUF3267 (peptidase M50) (22)                                                                    |
| GhoT/YjdO,<br>DUF2566                                  | Membrane protein                                                | GhoS/YjdK,<br>DUF2622 endo-<br>ribonuclease | Ferredoxin fold (2llz)                                                      | Proposed type V toxin-antitoxin system, antitoxin cleaves toxin mRNA (23), Specific for Gamma-proteobacteria                                                                                                                               |

<sup>a</sup>Identification of protein domains and functional prediction for experimentally uncharacterized proteins was based on the results of protein sequence and structure database searches using the PSI-BLAST and HHPred methods (5,6).

**Table S4. Abortive infection and phage exclusion systems<sup>a</sup>**

| Name                                 | Source                                                                                | Reference | Phyletic spread                                                                                                                      | Comments and additional references                                                                                                                                                                                                                                                                                                                         |
|--------------------------------------|---------------------------------------------------------------------------------------|-----------|--------------------------------------------------------------------------------------------------------------------------------------|------------------------------------------------------------------------------------------------------------------------------------------------------------------------------------------------------------------------------------------------------------------------------------------------------------------------------------------------------------|
| AbiA/<br>abi829                      | <i>Lactococcus lactis</i><br>plasmid pCI829                                           | (24,25)   | Several<br>diverse<br>Firmicutes                                                                                                     | RT domain fused to C-terminal HEPN domain (2);<br>also pTR2030;affects phage DNA replication (26)                                                                                                                                                                                                                                                          |
| AbiB/<br>abi416                      | <i>L. lactis subsp.</i><br><i>lactis</i> IL416<br>genome                              | (27,28)   | <i>Lactococcus</i><br>only                                                                                                           | AbiB prevents phage growth by promoting<br>degradation of phage transcripts by<br>endonucleolytic cleavage.<br>Putative PD-(D/E)xK family nuclease (motif and<br>secondary structure prediction)                                                                                                                                                           |
| AbiC                                 | <i>L.lactis</i><br>pTN20                                                              | (29)      |                                                                                                                                      | See AbiP; interferes with capsid production                                                                                                                                                                                                                                                                                                                |
| AbiD1<br>AbiD<br>(abi_2)             | <i>L.lactis</i> plasmids<br>pBF61<br>pIL105                                           | (30-33)   | Abundant in<br>bacteria                                                                                                              | HEPN domain, predicted ribonuclease (2)<br>Over-production of AbiD1 shown to possess<br>bacteriostatic effect; expression of the <i>abiD1</i> gene<br>is specifically translationally activated by phage<br>and is temperature-dependent; affects expression<br>of <i>Lactococcus</i> phage bIL66 orf3, RuvC resolvase,<br>necessary for phage replication |
| AbiE                                 | <i>L.lactis subsp. lactis</i><br>biovar <i>diacetylactis</i><br>DRC3<br>plasmid pNP40 | (34)      |                                                                                                                                      | See AbiG; interferes with DNA packaging                                                                                                                                                                                                                                                                                                                    |
| AbiF                                 | <i>L.lactis subsp. lactis</i><br>biovar <i>diacetylactis</i><br>DRC3<br>plasmid pNP40 | (34)      |                                                                                                                                      | See AbiD                                                                                                                                                                                                                                                                                                                                                   |
| AbiG<br>(AbiGi<br>and<br>AbiGii<br>) | <i>L. lactis subsp.</i><br><i>cremoris</i> UC653<br>pCI750                            | (35)      | Abundant in<br>bacteria and<br>archaea                                                                                               | Predicted toxin-antitoxin system: toxin is a<br>predicted nucleotidyltransferase<br>(COG2253/COG4849/COG4914 families) and<br>antitoxin is an HTH domain-containing protein<br>(COG5340/COG4861 families); constitutively<br>expressed; inhibits synthesis of both early and late<br>phage c2 transcripts                                                  |
| AbiH                                 | <i>L.lactis ssp. lactis</i><br>biovar. <i>diacetylactis</i><br>S94<br>chromosome      | (36)      | Abundant in<br>bacteria                                                                                                              | Predicted nuclease of the Sir2 family                                                                                                                                                                                                                                                                                                                      |
| AbiI                                 | <i>L.lactis subsp. lactis</i><br>M138<br>plasmid<br>pND852                            | (37)      | Abundant in<br>bacteri, also<br>present in<br>several<br>archaea<br>and phages<br>(Gp21 protein<br>[ <i>Listeria</i><br>phage 2389]) | Ribonuclease H superfamily, related to DUF3800<br>family; interferes with DNA packaging                                                                                                                                                                                                                                                                    |
| AbiJ                                 | <i>L.lactis</i> biovar.<br><i>diacetylactis</i><br>UK12922                            | (38)      | Abundant in<br>bacteria                                                                                                              | C-terminal HEPN domain, predicted ribonuclease,<br>also known as Abi-859 (2)                                                                                                                                                                                                                                                                               |

|                         |                                                                                 |         |                                                                       |                                                                                                                                                                                                                                                                              |
|-------------------------|---------------------------------------------------------------------------------|---------|-----------------------------------------------------------------------|------------------------------------------------------------------------------------------------------------------------------------------------------------------------------------------------------------------------------------------------------------------------------|
|                         | plasmid pND859                                                                  |         |                                                                       |                                                                                                                                                                                                                                                                              |
| AbiK                    | pSRQ800<br>10708383                                                             | (39)    |                                                                       | see AbiA; RT domain; interferes with phage DNA replication                                                                                                                                                                                                                   |
| AbiLi<br>AbiLii         | <i>L. lactis</i><br><i>diacetylactis</i><br>pND861                              | (7,40)  | Abundant in bacteria, also present in several archaea                 | AbiLi: ATPase (COG4637 or COG1106 family); AbiLii: Toprim domain, homolog of <i>rloB</i> , the gene found within Type I R-M system locus in <i>Campylobacter jejuni</i> (7)                                                                                                  |
| AbiN                    | <i>L.lactis subsp. cremoris</i> S114 prophage                                   | (41)    | Diverse bacteria, several archaea and phages                          | Membrane-associated coiled-coil protein homologous to N-terminal domain present in RNase Y family (42)                                                                                                                                                                       |
| AbiO                    | <i>L.lactis ssp. lactis</i> MG1363 plasmid pPF144                               | (43)    | Mostly diverse Firmicutes, Mollicutes and several phages              | PD-(D/E)xK-family nuclease domain fused to a helicase (COG3410)                                                                                                                                                                                                              |
| AbiP                    | <i>L. lactis sp. lactis</i> IL1403 plasmid pIL2614                              | (44)    | Patchy distribution in diverse bacterial lineages                     | See AbiC; membrane anchored protein, shown to bind nucleic acids with an approximately 10-fold preference for RNA relative to ssDNA; interferes with phage DNA replication                                                                                                   |
| AbiQ                    | <i>L. lactis</i> LM0230 plasmid pSRQ900                                         | (45,46) | Patchy distribution in diverse bacterial lineages                     | Type III TA system with a ToxN toxin related to MazF superfamily type II toxins (47) and a RNA antitoxin interacting with the ToxN protein; interferes with DNA packaging                                                                                                    |
| AbiR                    | <i>L. lactis subsp. lactis</i><br><i>bv.diacetylactis</i><br>KR2 plasmid pKR223 | (48)    | Abundant in bacteria and in archaea (COG0553)                         | ORF1,2,3 (COG0553),4 are involved; inhibits phage DNA replication; always associated with R-M systems                                                                                                                                                                        |
| AbiS                    | <i>L. lactis subsp. cremoris</i> W56 plasmid pAW601                             | (49,50) | Unique                                                                | Not associated with any protein coding region, mostly functional against lactococcal 936-phages probably because of repeated DNA sequences are similar to cos regions of these phage; repeated DNA sequences may titer factors necessary for phage development               |
| AbiT                    | <i>L. lactis</i> W51 plasmid pED1                                               | (51)    | Patchy distribution in bacteria                                       | AbiT <sub>i</sub> and AbiT <sub>ii</sub> are fused in many cases; hydrophobic region in AbiT <sub>i</sub> protein is important for antiphage defense; interferes with phage DNA replication; AbiT <sub>ii</sub> domain could fused to HEPN domain and DNA-binding HHH domain |
| AbiU1/<br>AbiU2<br>RloA | <i>L.lactis subsp. lactis</i> UK21371 Plasmid pND001                            | (52)    | Abundant in bacteria (AbiU1); patchy distribution in bacteria (AbiU2) | AbiU1/AIPR N-terminal domain PD-(D/E)xK-family nuclease; C-terminal domain, ParB-like nuclease fold (DGQHR/AIPR domain); AbiU2: HEPN domain (2)                                                                                                                              |
| AbiV                    | <i>L.lactis subsp. cremoris</i> MG136                                           | (53,54) | Patchy distribution in                                                | AbiV belongs to the HEPN superfamily (2); <i>Sav</i> is a phage gene, that is affected by AbiV mechanism                                                                                                                                                                     |

|               |                                         |         |                                                                                      |                                                                                                                                                                                                                                                                                  |
|---------------|-----------------------------------------|---------|--------------------------------------------------------------------------------------|----------------------------------------------------------------------------------------------------------------------------------------------------------------------------------------------------------------------------------------------------------------------------------|
|               | chromosomally-encoded                   |         | bacteria                                                                             |                                                                                                                                                                                                                                                                                  |
| AbiZ          | <i>L.lactis</i> DPC3147 plasmid pTR2030 | (55)    | <i>Lactococcus</i> and <i>Enterococcus</i> only                                      | Small, mostly helical protein. AbiZ possibly interacts with holin to cause premature cell lysis                                                                                                                                                                                  |
| RexA/<br>RexB | bacteriophage lambda                    | (56)    | RexA shows a patchy distribution in bacteria; only a few homologs of RexB identified | RexA senses infection and activates RexB, a membrane protein that reduces membrane potential and causes cell death; RIIA and RIIB proteins of phage T4 abrogate this effect                                                                                                      |
| PrrC/<br>RloC | <i>Escherichia coli</i> K-12            | (57,58) | Patchy distribution in bacteria                                                      | ATP-dependent anticodon tRNase associated with type Ic R-M systems; N-terminal domain: AAA superfamily ATPase (COG4694); C-terminal tRNase domain is a diverged member of the HEPN superfamily (2); PrrC is activated by Stp, the T4-encoded PrrI restriction nuclease inhibitor |
| Lit           | <i>Escherichia coli</i> K-12            | (59)    | Mostly in Proteobacteria and several Bacteroidetes                                   | Metallopeptidase U49 homologous to DUF955 associated with toxin-antitoxin systems; activated by the major head protein of T4 phage; cleaves host translation factor EF-Tu leading to cell death                                                                                  |
| PifA          | <i>Escherichia coli</i> K-12 F-plasmid  | (60)    | Abundant in bacteria                                                                 | Membrane-associated P-loop NTPase (COG4928), involved in phage T7 exclusion through membrane damage; <i>E.coli</i> membrane protein FxsA sequesters PifA and prevents phage exclusion (61)                                                                                       |

<sup>a</sup>Identification of protein domains and functional prediction for experimentally uncharacterized proteins was based on the results of protein sequence and structure database searches using the PSI-BLAST and HHPred methods (5,6).

## References

1. Makarova, K.S., Wolf, Y.I., Snir, S. and Koonin, E.V. (2011) Defense islands in bacterial and archaeal genomes and prediction of novel defense systems. *J Bacteriol*, **193**, 6039-6056.
2. Anantharaman, V., Makarova, K.S., Burroughs, A.M., Koonin, E.V. and Aravind, L. (2013) HEPN: A major nucleic-acid targeting domain involved in intra-genomic conflicts, defense, pathogenesis and RNA processing. *Biology Direct*, in press.

3. Hu, W., Wang, C., Liang, J., Zhang, T., Hu, Z., Wang, Z., Lan, W., Li, F., Wu, H., Ding, J. *et al.* (2012) Structural insights into DndE from *Escherichia coli* B7A involved in DNA phosphorothioation modification. *Cell Res*, **22**, 1203-1206.
4. Iyer, L.M., Abhiman, S. and Aravind, L. (2008) MutL homologs in restriction-modification systems and the origin of eukaryotic MORC ATPases. *Biol Direct*, **3**, 8.
5. Altschul, S.F., Madden, T.L., Schaffer, A.A., Zhang, J., Zhang, Z., Miller, W. and Lipman, D.J. (1997) Gapped BLAST and PSI-BLAST: a new generation of protein database search programs. *Nucleic Acids Res*, **25**, 3389-3402.
6. Soding, J., Biegert, A. and Lupas, A.N. (2005) The HHpred interactive server for protein homology detection and structure prediction. *Nucleic Acids Res*, **33**, W244-248.
7. Miller, W.G., Pearson, B.M., Wells, J.M., Parker, C.T., Kapitonov, V.V. and Mandrell, R.E. (2005) Diversity within the *Campylobacter jejuni* type I restriction-modification loci. *Microbiology*, **151**, 337-351.
8. Makarova, K.S., Wolf, Y.I. and Koonin, E.V. (2009) Comprehensive comparative-genomic analysis of type 2 toxin-antitoxin systems and related mobile stress response systems in prokaryotes. *Biol Direct*, **4**, 19.
9. Pope, M.K., Green, B. and Westpheling, J. (1998) The *bldB* gene encodes a small protein required for morphogenesis, antibiotic production, and catabolite control in *Streptomyces coelicolor*. *J Bacteriol*, **180**, 1556-1562.
10. Nakano, S., Erwin, K.N., Ralle, M. and Zuber, P. (2005) Redox-sensitive transcriptional control by a thiol/disulphide switch in the global regulator, Spx. *Mol Microbiol*, **55**, 498-510.



11. Leplae, R., Geeraerts, D., Hallez, R., Guglielmini, J., Dreze, P. and Van Melderen, L. (2011) Diversity of bacterial type II toxin-antitoxin systems: a comprehensive search and functional analysis of novel families. *Nucleic Acids Res*, **39**, 5513-5525.
12. Koga, M., Otsuka, Y., Lemire, S. and Yonesaki, T. (2011) Escherichia coli rnlA and rnlB compose a novel toxin-antitoxin system. *Genetics*, **187**, 123-130.
13. Otsuka, Y. and Yonesaki, T. (2005) A novel endoribonuclease, RNase LS, in Escherichia coli. *Genetics*, **169**, 13-20.
14. Jorgensen, M.G., Pandey, D.P., Jaskolska, M. and Gerdes, K. (2009) HicA of Escherichia coli defines a novel family of translation-independent mRNA interferases in bacteria and archaea. *J Bacteriol*, **191**, 1191-1199.
15. Zhang, Y., Yamaguchi, Y. and Inouye, M. (2009) Characterization of YafO, an Escherichia coli toxin. *J Biol Chem*, **284**, 25522-25531.
16. Zhang, F., Xing, L., Teng, M. and Li, X. (2012) Crystallization and preliminary crystallographic studies of the YafN-YafO complex from Escherichia coli. *Acta Crystallogr Sect F Struct Biol Cryst Commun*, **68**, 894-897.
17. Tan, Q., Awano, N. and Inouye, M. (2011) YeeV is an Escherichia coli toxin that inhibits cell division by targeting the cytoskeleton proteins, FtsZ and MreB. *Mol Microbiol*, **79**, 109-118.
18. Arbing, M.A., Handelman, S.K., Kuzin, A.P., Verdon, G., Wang, C., Su, M., Rothenbacher, F.P., Abashidze, M., Liu, M., Hurley, J.M. *et al.* (2010) Crystal structures of Phd-Doc, HigA, and YeeU establish multiple evolutionary links between microbial growth-regulating toxin-antitoxin systems. *Structure*, **18**, 996-1010.

19. Masuda, H., Tan, Q., Awano, N., Wu, K.P. and Inouye, M. (2012) YeeU enhances the bundling of cytoskeletal polymers of MreB and FtsZ, antagonizing the CbtA (YeeV) toxicity in *Escherichia coli*. *Mol Microbiol*, **84**, 979-989.
20. Murphy, K.C. (2007) The lambda Gam protein inhibits RecBCD binding to dsDNA ends. *J Mol Biol*, **371**, 19-24.
21. Scaltriti, E., Moineau, S., Launay, H., Masson, J.Y., Rivetti, C., Ramoni, R., Campanacci, V., Tegoni, M. and Cambillau, C. (2010) Deciphering the function of lactococcal phage  $\phi$ 36 Sak domains. *J Struct Biol*, **170**, 462-469.
22. Kinch, L.N., Ginalski, K. and Grishin, N.V. (2006) Site-2 protease regulated intramembrane proteolysis: sequence homologs suggest an ancient signaling cascade. *Protein Sci*, **15**, 84-93.
23. Wang, X., Lord, D.M., Cheng, H.Y., Osbourne, D.O., Hong, S.H., Sanchez-Torres, V., Quiroga, C., Zheng, K., Herrmann, T., Peti, W. *et al.* (2012) A new type V toxin-antitoxin system where mRNA for toxin GhoT is cleaved by antitoxin GhoS. *Nat Chem Biol*.
24. Coffey, A.G., Fitzgerald, G.F. and Daly, C. (1991) Cloning and characterization of the determinant for abortive infection of bacteriophage from lactococcal plasmid pCI829. *J Gen Microbiol*, **137**, 1355-1362.
25. Tangney, M. and Fitzgerald, G.F. (2002) Effectiveness of the lactococcal abortive infection systems AbiA, AbiE, AbiF and AbiG against P335 type phages. *FEMS Microbiol Lett*, **210**, 67-72.
26. O'Sullivan, D.J. and Klaenhammer, T.R. (1998) Control of expression of LlaI restriction in *Lactococcus lactis*. *Mol Microbiol*, **27**, 1009-1020.

27. Cluzel, P.J., Chopin, A., Ehrlich, S.D. and Chopin, M.C. (1991) Phage abortive infection mechanism from *Lactococcus lactis* subsp. *lactis*, expression of which is mediated by an Iso-ISS1 element. *Appl Environ Microbiol*, **57**, 3547-3551.
28. Parreira, R., Ehrlich, S.D. and Chopin, M.C. (1996) Dramatic decay of phage transcripts in lactococcal cells carrying the abortive infection determinant *AbiB*. *Mol Microbiol*, **19**, 221-230.
29. Durmaz, E., Higgins, D.L. and Klaenhammer, T.R. (1992) Molecular characterization of a second abortive phage resistance gene present in *Lactococcus lactis* subsp. *lactis* ME2. *J Bacteriol*, **174**, 7463-7469.
30. Bidnenko, E., Ehrlich, D. and Chopin, M.C. (1995) Phage operon involved in sensitivity to the *Lactococcus lactis* abortive infection mechanism *AbiD1*. *J Bacteriol*, **177**, 3824-3829.
31. Anba, J., Bidnenko, E., Hillier, A., Ehrlich, D. and Chopin, M.C. (1995) Characterization of the lactococcal *abiD1* gene coding for phage abortive infection. *J Bacteriol*, **177**, 3818-3823.
32. Bidnenko, E., Chopin, A., Ehrlich, S.D. and Chopin, M.C. (2009) Activation of mRNA translation by phage protein and low temperature: the case of *Lactococcus lactis* abortive infection system *AbiD1*. *BMC Mol Biol*, **10**, 4.
33. Bidnenko, E., Ehrlich, S.D. and Chopin, M.C. (1998) *Lactococcus lactis* phage operon coding for an endonuclease homologous to *RuvC*. *Mol Microbiol*, **28**, 823-834.
34. Garvey, P., Fitzgerald, G.F. and Hill, C. (1995) Cloning and DNA sequence analysis of two abortive infection phage resistance determinants from the lactococcal plasmid *pNP40*. *Appl Environ Microbiol*, **61**, 4321-4328.

35. O'Connor, L., Tangney, M. and Fitzgerald, G.F. (1999) Expression, regulation, and mode of action of the AbiG abortive infection system of *Lactococcus lactis* subsp. *cremoris* UC653. *Appl Environ Microbiol*, **65**, 330-335.
36. Prevots, F., Daloyau, M., Bonin, O., Dumont, X. and Tolou, S. (1996) Cloning and sequencing of the novel abortive infection gene *abiH* of *Lactococcus lactis* ssp. *lactis* biovar. *diacetylactis* S94. *FEMS Microbiol Lett*, **142**, 295-299.
37. Su, P., Harvey, M., Im, H.J. and Dunn, N.W. (1997) Isolation, cloning and characterisation of the *abiI* gene from *Lactococcus lactis* subsp. *lactis* M138 encoding abortive phage infection. *J Biotechnol*, **54**, 95-104.
38. Deng, Y.M., Harvey, M.L., Liu, C.Q. and Dunn, N.W. (1997) A novel plasmid-encoded phage abortive infection system from *Lactococcus lactis* biovar. *diacetylactis*. *FEMS Microbiol Lett*, **146**, 149-154.
39. Boucher, I., Emond, E., Dion, E., Montpetit, D. and Moineau, S. (2000) Microbiological and molecular impacts of *AbiK* on the lytic cycle of *Lactococcus lactis* phages of the 936 and P335 species. *Microbiology*, **146** ( Pt 2), 445-453.
40. Deng, Y.M., Liu, C.Q. and Dunn, N.W. (1999) Genetic organization and functional analysis of a novel phage abortive infection system, *AbiL*, from *Lactococcus lactis*. *J Biotechnol*, **67**, 135-149.
41. Prevots, F., Tolou, S., Delpech, B., Kaghad, M. and Daloyau, M. (1998) Nucleotide sequence and analysis of the new chromosomal abortive infection gene *abiN* of *Lactococcus lactis* subsp. *cremoris* S114. *FEMS Microbiol Lett*, **159**, 331-336.
42. Lehnik-Habrink, M., Newman, J., Rothe, F.M., Solovyova, A.S., Rodrigues, C., Herzberg, C., Commichau, F.M., Lewis, R.J. and Stulke, J. (2011) RNase Y in *Bacillus*

- subtilis: a Natively disordered protein that is the functional equivalent of RNase E from *Escherichia coli*. *J Bacteriol*, **193**, 5431-5441.
43. Prevots, F. and Ritzenthaler, P. (1998) Complete sequence of the new lactococcal abortive phage resistance gene *abiO*. *J Dairy Sci*, **81**, 1483-1485.
  44. Domingues, S., McGovern, S., Plochocka, D., Santos, M.A., Ehrlich, S.D., Polard, P. and Chopin, M.C. (2008) The lactococcal abortive infection protein *AbiP* is membrane-anchored and binds nucleic acids. *Virology*, **373**, 14-24.
  45. Emond, E., Dion, E., Walker, S.A., Vedamuthu, E.R., Kondo, J.K. and Moineau, S. (1998) *AbiQ*, an abortive infection mechanism from *Lactococcus lactis*. *Appl Environ Microbiol*, **64**, 4748-4756.
  46. Fineran, P.C., Blower, T.R., Foulds, I.J., Humphreys, D.P., Lilley, K.S. and Salmond, G.P. (2009) The phage abortive infection system, *ToxIN*, functions as a protein-RNA toxin-antitoxin pair. *Proc Natl Acad Sci U S A*, **106**, 894-899.
  47. Blower, T.R., Pei, X.Y., Short, F.L., Fineran, P.C., Humphreys, D.P., Luisi, B.F. and Salmond, G.P. (2011) A processed noncoding RNA regulates an altruistic bacterial antiviral system. *Nat Struct Mol Biol*, **18**, 185-190.
  48. Twomey, D.P., De Urza, P.J., McKay, L.L. and O'Sullivan, D.J. (2000) Characterization of *AbiR*, a novel multicomponent abortive infection mechanism encoded by plasmid *pKR223* of *Lactococcus lactis* subsp. *lactis* KR2. *Appl Environ Microbiol*, **66**, 2647-2651.
  49. Kong, J., Josephsen, J. and Ma, G.R. (2002) [The resistance conferred by the R/M system *LlaBIII* against bacteriophages]. *Wei Sheng Wu Xue Bao*, **42**, 246-250.

50. Holubova, J. and Josephsen, J. (2007) Potential of AbiS as defence mechanism determined by conductivity measurement. *J Appl Microbiol*, **103**, 2382-2391.
51. Bouchard, J.D., Dion, E., Bissonnette, F. and Moineau, S. (2002) Characterization of the two-component abortive phage infection mechanism AbiT from *Lactococcus lactis*. *J Bacteriol*, **184**, 6325-6332.
52. Dai, G., Su, P., Allison, G.E., Geller, B.L., Zhu, P., Kim, W.S. and Dunn, N.W. (2001) Molecular characterization of a new abortive infection system (AbiU) from *Lactococcus lactis* LL51-1. *Appl Environ Microbiol*, **67**, 5225-5232.
53. Haaber, J., Moineau, S., Fortier, L.C. and Hammer, K. (2008) AbiV, a novel antiphage abortive infection mechanism on the chromosome of *Lactococcus lactis* subsp. *cremoris* MG1363. *Appl Environ Microbiol*, **74**, 6528-6537.
54. Haaber, J., Rousseau, G.M., Hammer, K. and Moineau, S. (2009) Identification and characterization of the phage gene sav, involved in sensitivity to the lactococcal abortive infection mechanism AbiV. *Appl Environ Microbiol*, **75**, 2484-2494.
55. Durmaz, E. and Klaenhammer, T.R. (2007) Abortive phage resistance mechanism AbiZ speeds the lysis clock to cause premature lysis of phage-infected *Lactococcus lactis*. *J Bacteriol*, **189**, 1417-1425.
56. Parma, D.H., Snyder, M., Sobolevski, S., Nawroz, M., Brody, E. and Gold, L. (1992) The Rex system of bacteriophage lambda: tolerance and altruistic cell death. *Genes Dev*, **6**, 497-510.
57. Blanga-Kanfi, S., Amitsur, M., Azem, A. and Kaufmann, G. (2006) PrrC-anticodon nuclease: functional organization of a prototypical bacterial restriction RNase. *Nucleic Acids Res*, **34**, 3209-3219.

58. Davidov, E. and Kaufmann, G. (2008) RloC: a wobble nucleotide-excising and zinc-responsive bacterial tRNase. *Mol Microbiol*, **69**, 1560-1574.
59. Copeland, N.A., Bingham, R., Georgiou, T., Cooper, P. and Kleanthous, C. (2004) Identification of essential residues within Lit, a cell death peptidase of Escherichia coli K-12. *Biochemistry*, **43**, 7948-7953.
60. Schmitt, C.K., Kemp, P. and Molineux, I.J. (1991) Genes 1.2 and 10 of bacteriophages T3 and T7 determine the permeability lesions observed in infected cells of Escherichia coli expressing the F plasmid gene pifA. *J Bacteriol*, **173**, 6507-6514.
61. Cheng, X., Wang, W. and Molineux, I.J. (2004) F exclusion of bacteriophage T7 occurs at the cell membrane. *Virology*, **326**, 340-352.
